# Supplementary material for: Multilocus Phylogeny and Characterization of Five Undescribed Aquatic Carnivorous Fungi (Orbiliomycetes)
Source: MDPI journal article supplement (doi:10.3390/jof10010081), 2024-01-20
Supplement: s1 [file s1]

**Table S1.** GenBank accession numbers involved in this study. Ex-type strains are in bold. The newly generated sequences are indicated in blue.

| Taxon                          | Strain Number | GenBank accession Number |                |          |
|--------------------------------|---------------|--------------------------|----------------|----------|
|                                |               | ITS                      | TEF1- $\alpha$ | RPB2     |
| <i>Arthrobotrys amerospora</i> | CBS 268.83    | NR_159625                | — —            | — —      |
| <i>A. anomala</i>              | YNWS02-5-1    | AY773451                 | AY773393       | AY773422 |
| <i>A. arthrobotryoides</i>     | AOAC          | MF926580                 | — —            | — —      |
| <i>A. blastospora</i>          | CGMCC 3.20940 | OQ332405                 | OQ341651       | OQ341649 |
| <i>A. botryospora</i>          | CBS 321.83    | NR_159626                | — —            | — —      |
| <i>A. cibiensis</i>            | DLUCC 109     | OR880379                 | OR882792       | OR882797 |
| <i>A. cibiensis</i>            | EY10          | OR902195                 | OR882787       | OR882802 |
| <i>A. cladodes</i>             | 1.03514       | MH179793                 | MH179616       | MH179893 |
| <i>A. clavispora</i>           | CBS 545.63    | MH858353                 | — —            | — —      |
| <i>A. conoides</i>             | 670           | AY773455                 | AY773397       | AY773426 |
| <i>A. cookedickinson</i>       | YMF 1.00024   | MF948393                 | MF948550       | MF948474 |
| <i>A. cystosporia</i>          | CBS 439.54    | MH857384                 | — —            | — —      |
| <i>A. dendroides</i>           | YMF 1.00010   | MF948388                 | MF948545       | MF948469 |
| <i>A. dianchiensis</i>         | 1.00571       | MH179720                 | — —            | MH179826 |
| <i>A. elegans</i>              | 1.00027       | MH179688                 | — —            | MH179797 |
| <i>A. eryuanensis</i>          | CGMCC 3.19715 | MT612105                 | OM850307       | OM850301 |
| <i>A. eudermata</i>            | SDT24         | AY773465                 | AY773407       | AY773436 |
| <i>A. flagrans</i>             | 1.01471       | MH179741                 | MH179583       | MH179845 |
| <i>A. gampsospora</i>          | CBS 127.83    | U51960                   | — —            | — —      |
| <i>A. globospora</i>           | 1.00537       | MH179706                 | MH179562       | MH179814 |
| <i>A. gongshanensis</i>        | CGMCC 3.23753 | OM801277                 | OM809162       | OM809163 |
| <i>A. guizhouensis</i>         | YMF 1.00014   | MF948390                 | MF948547       | MF948471 |
| <i>A. heihuiensis</i>          | DLUCC 108-1   | OR880378                 | OR882791       | OR882796 |
| <i>A. heihuiensis</i>          | Y710          | OR902194                 | OR882786       | OR882801 |
| <i>A. hengjiangensis</i>       | CGMCC 3.24983 | OQ946587                 | OQ989312       | OQ989302 |
| <i>A. hyrcanus</i>             | IRAN 3650C    | MH367058                 | OP351540       | — —      |
| <i>A. indica</i>               | YMF 1.01845   | KT932086                 | — —            | — —      |
| <i>A. iridis</i>               | 521           | AY773452                 | AY773394       | AY773423 |
| <i>A. janus</i>                | 85-1          | AY773459                 | AY773401       | AY773430 |
| <i>A. javanica</i>             | 105           | EU977514                 | — —            | — —      |
| <i>A. jindingensis</i>         | CGMCC 3.20895 | OP236810                 | OP272511       | OP272515 |
| <i>A. jinpingensis</i>         | CGMCC 3.20896 | OM855569                 | OM850311       | OM850305 |
| <i>A. jinshaensis</i>          | DLUCC 133     | OR880381                 | OR882794       | OR882799 |
| <i>A. jinshaensis</i>          | MA142         | OR902197                 | OR882789       | OR882804 |
| <i>A. koreensis</i>            | C45           | JF304780                 | — —            | — —      |
| <i>A. lanpingensis</i>         | CGMCC 3.20998 | OM855566                 | OM850308       | OM850302 |
| <i>A. latispora</i>            | H.B. 8952     | MK493125                 | — —            | — —      |

|                           |               |          |          |          |
|---------------------------|---------------|----------|----------|----------|
| <i>A. longiphora</i>      | 1.00538       | MH179707 | — —      | MH179815 |
| <i>A. lunzhangensis</i>   | CGMCC 3.20941 | OK643973 | OM621809 | OM621810 |
| <i>A. luquanensis</i>     | CGMCC 3.20894 | OM855567 | OM850309 | OM850303 |
| <i>A. mangrovispora</i>   | MGDW17        | EU573354 | — —      | — —      |
| <i>A. megalospora</i>     | TWF800        | MN013995 | — —      | — —      |
| <i>A. microscaphoides</i> | YMF 1.00028   | MF948395 | MF948552 | MF948476 |
| <i>A. multiformis</i>     | CBS 773.84    | MH861834 | — —      | — —      |
| <i>A. musiformis</i>      | SQ77-1        | AY773469 | AY773411 | AY773440 |
| <i>A. musiformis</i>      | 1.03481       | MH179783 | MH179607 | MH179883 |
| <i>A. nonseptata</i>      | YMF 1.01852   | FJ185261 | — —      | — —      |
| <i>A. obovata</i>         | YMF 1.00011   | MF948389 | MF948546 | MF948470 |
| <i>A. oligospora</i>      | 920           | AY773462 | AY773404 | AY773433 |
| <i>A. paucispora</i>      | ATCC 96704    | EF445991 | — —      | — —      |
| <i>A. polycephala</i>     | 1.01888       | MH179760 | MH179592 | MH179862 |
| <i>A. pseudoclavata</i>   | 1130          | AY773446 | AY773388 | AY773417 |
| <i>A. psychrophila</i>    | 1.01412       | MH179727 | MH179578 | MH179832 |
| <i>A. pyriformis</i>      | YNWS02-3-1    | AY773450 | AY773392 | AY773421 |
| <i>A. reticulata</i>      | CBS 550.63    | MH858355 | — —      | — —      |
| <i>A. robusta</i>         | nefuA4        | MZ326655 | — —      | — —      |
| <i>A. salina</i>          | SF 0459       | KP036623 | — —      | — —      |
| <i>A. scaphoides</i>      | 1.01442       | MH179732 | MH179580 | MH179836 |
| <i>A. shizishanna</i>     | YMF 1.00022   | MF948392 | MF948549 | MF948473 |
| <i>A. shuifuensis</i>     | CGMCC 3.19716 | MT612334 | OM850306 | OM850300 |
| <i>A. sinensis</i>        | 105-1         | AY773445 | AY773387 | AY773416 |
| <i>A. sphaeroides</i>     | 1.01410       | MH179726 | MH179577 | MH179831 |
| <i>A. superba</i>         | 127           | EU977558 | — —      | — —      |
| <i>A. thaumasia</i>       | 917           | AY773461 | AY773403 | AY773432 |
| <i>A. tongdianensis</i>   | CGMCC 3.20942 | OP236809 | OP272509 | OP272513 |
| <i>A. vermicola</i>       | 629           | AY773454 | AY773396 | AY773425 |
| <i>A. weixiensis</i>      | CGMCC 3.24984 | OQ946585 | OQ989310 | OQ989300 |
| <i>A. xiangyunensis</i>   | YXY10-1       | MK537299 | — —      | — —      |
| <i>A. yangbiensis</i>     | DLUCC 36-1    | OR880382 | OR882795 | OR882800 |
| <i>A. yangbiensis</i>     | Y678          | OR902198 | OR882790 | OR882805 |
| <i>A. yangjiangensis</i>  | DLUCC 124     | OR880380 | OR882793 | OR882798 |
| <i>A. yangjiangensis</i>  | YB19          | OR902196 | OR882788 | OR882803 |
| <i>A. yunnanensis</i>     | YMF 1.00593   | AY50993  | — —      | — —      |
| <i>A. zhaoyangensis</i>   | CGMCC 3.20944 | OM855568 | OM850310 | OM850304 |
| <i>Dactylellina</i>       |               |          |          |          |
| <i>cangshanensis</i>      | CGMCC 3.19714 | MK372062 | MN915115 | MN915114 |
| <i>Da. copepodii</i>      | CBS 487.90    | U51964   | DQ999835 | DQ999816 |
| <i>Da. mammillata</i>     | CBS 229.54    | AY902794 | DQ999843 | DQ999817 |
| <i>Da. yushanensis</i>    | CGMCC 3.19713 | MK372061 | MN915113 | MN915112 |
| <i>Drechslerella</i>      |               |          |          |          |
| <i>coelobrocha</i>        | FWY03-25-1    | AY773464 | AY773406 | AY773435 |

|                                |                      |                  |                 |                 |
|--------------------------------|----------------------|------------------|-----------------|-----------------|
| <i>Dr. dactyloides</i>         | expo-5               | AY773463         | AY773405        | AY773434        |
| <b><i>Dr. daliensis</i></b>    | <b>CGMCC 3.20131</b> | <b>MT592896</b>  | <b>OK556701</b> | <b>OK638157</b> |
| <i>Dr. heterospora</i>         | YMF 1.00550          | MF948400         | MF948554        | MF948480        |
| <i>Dr. stenobrocha</i>         | YNWS02-9-1           | AY773460         | AY773402        | AY773431        |
| <b><i>Dr. xiaguanensis</i></b> | <b>CGMCC 3.20132</b> | <b>MT592900</b>  | <b>OK556699</b> | <b>OK638159</b> |
| <i>Orbilina</i>                |                      |                  |                 |                 |
| <i>jesu-laurae</i>             | <b>LQ59a</b>         | <b>MN816816</b>  | — —             | — —             |
| <b><i>O. tonghaiensis</i></b>  | <b>YMF 1.03006</b>   | <b>NR_172397</b> | <b>MF948570</b> | <b>MF948496</b> |
| <i>Vermispora fusarina</i>     | YXJ02-13-5           | AY773447         | AY773389        | AY773418        |
| <i>V. leguminacea</i>          | CGMCC 6.0291         | NR_173249        | — —             | — —             |

---
